# Supplementary material for: Cohesin Is Required for Activation of MYC by Estradiol
Source: PubMed Central journal article supplement (PMC3493498; doi:10.1371/journal.pone.0049160), 2012-11-08

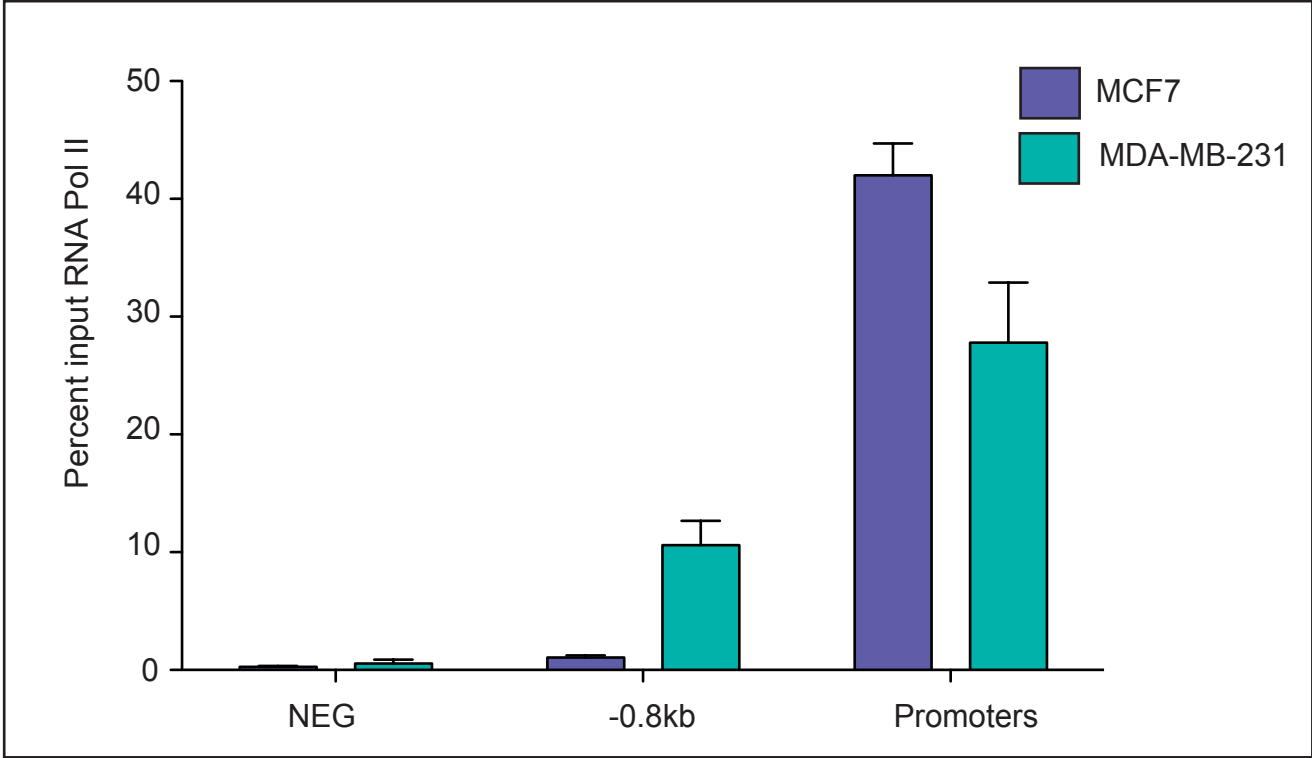

Supplement: pone.0049160.s001.pdf [file pone.0049160.s001.pdf]
