# Supplementary material for: Cohesin Is Required for Activation of MYC by Estradiol
Source: PubMed Central journal article supplement (PMC3493498; doi:10.1371/journal.pone.0049160), 2012-11-08

Location on  
Chromosome 8:  
(Hg16)

128,805,668

128,809,668

128,813,668

128,817,668

128,821,668

ChIP primers

ERE 2 -8 kb

-0.8 kb Promoters

*MYC*

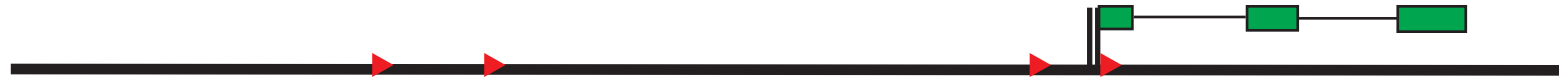

Supplement: pone.0049160.s003.pdf [file pone.0049160.s003.pdf]
